# Supplementary material for: Antimicrobial Peptides: Identification of two Beta-Defensins in a Teleost Fish, the European Sea Bass (Dicentrarchus labrax)
Source: MDPI journal article supplement (doi:10.3390/ph14060566), 2021-06-14
Supplement: s1 [file s1]

**Table S3** Accession numbers of genes used in the synteny analysis of beta-defensins 1 and 2.

| Genes          | Species                         |                                 |                                 |                                 |                                 |
|----------------|---------------------------------|---------------------------------|---------------------------------|---------------------------------|---------------------------------|
|                | <i>D. labrax</i>                | <i>L. calcarifer</i>            | <i>S. aurata</i>                | <i>S. lalandi<sup>b</sup></i>   | <i>S. maximus<sup>b</sup></i>   |
| <i>defb1</i>   | ENSDLAG00005026052              | ENSLCAG00010025743 <sup>a</sup> | ENSSAUG00010014090              | ENSSLDG00000017411 <sup>a</sup> | ENSSMAG00000015557 <sup>a</sup> |
| <i>defb2</i>   | ENSDLAG00005001996              | ENSLCAG00010006231              | ENSSAUG00010026539              | ENSSLDG00000020114              | ENSSMAG00000013172              |
| <i>atp1b2b</i> | ENSDLAG00005026068              | ENSLCAG00010025763              | ENSSAUG00010015305              | ENSSLDG00000017566              | ENSSMAG00000015277              |
| <i>CAPN6</i>   | ENSDLAG00005001788              | ENSLCAG00010006146              | ENSSAUG00010025836              | ENSSLDG00000020262              | ENSSMAG00000013231              |
| <i>chrdl2</i>  | ENSDLAG00005002011              | ENSLCAG00010006252              | ENSSAUG00010026542              | ENSSLDG00000020064              | ENSSMAG00000013155              |
| <i>cnksr2b</i> | ENSDLAG00005025976              | ENSLCAG00010025729              | ENSSAUG00010014051              | ENSSLDG00000017251              | ENSSMAG00000015588              |
| <i>il13ra2</i> | ENSDLAG00005001759              | ENSLCAG00010006126              | ENSSAUG00010025832              | ENSSLDG00000020312              | ENSSMAG00000013307              |
| <i>KCNAB3</i>  | ENSDLAG00005002038              | ENSLCAG00010006338              | ENSSAUG00010026552              | ENSSLDG00000020006              | ENSSMAG00000013080              |
| <i>lrch2</i>   | ENSDLAG00005001681              | ENSLCAG00010006112              | ENSSAUG00010025830              | ENSSLDG00000020331              | ENSSMAG00000013376              |
| <i>mepce</i>   | ENSDLAG00005001988              | ENSLCAG00010006223              | ENSSAUG00010026538              | ENSSLDG00000020120              | ENSSMAG00000013182              |
| <i>mogat3b</i> | ENSDLAG00005026062              | ENSLCAG00010025759              | ENSSAUG00010015302              | ENSSLDG00000017526              | ENSSMAG00000015327              |
| <i>neu3.1</i>  | ENSDLAG00005002025              | ENSLCAG00010006274              | ENSSAUG00010026547              | ENSSLDG00000020043              | ENSSMAG00000013071              |
| <i>nyap1</i>   | ENSDLAG00005026065 <sup>a</sup> | ENSLCAG00010025761 <sup>a</sup> | ENSSAUG00010015303              | ENSSLDG00000017545              | ENSSMAG00000015310 <sup>a</sup> |
| <i>or121</i>   | ENSDLAG00005026051              | ENSLCAG00010025739              | ENSSAUG00010014085 <sup>a</sup> | ENSSLDG00000017386 <sup>a</sup> | ENSSMAG00000015567 <sup>a</sup> |
| <i>PAK3</i>    | ENSDLAG00005001894              | ENSLCAG00010006195              | ENSSAUG00010025886              | ENSSLDG00000020143              | ENSSMAG00000013188              |
| <i>rnf121</i>  | ENSDLAG00005025916              | ENSLCAG00010025715              | ENSSAUG00010014027              | ENSSLDG00000017174              | ENSSMAG00000015786              |
| <i>rnf167</i>  | ENSDLAG00005026054              | ENSLCAG00010025746              | ENSSAUG00010014093              | ENSSLDG00000017455              | ENSSMAG00000015502              |
| <i>rrm1</i>    | ENSDLAG00005025894              | ENSLCAG00010025699              | ENSSAUG00010013817              | ENSSLDG00000017093              | ENSSMAG00000015872              |
| <i>spag7</i>   | ENSDLAG00005002002              | ENSLCAG00010006239              | ENSSAUG00010026541              | ENSSLDG00000020103              | ENSSMAG00000013168              |
| <i>srrt</i>    | ENSDLAG00005026057              | ENSLCAG00010025754              | ENSSAUG00010014122              | ENSSLDG00000017477              | ENSSMAG00000015342              |
| <i>trpc2b</i>  | ENSDLAG00005025880              | ENSLCAG00010025683              | ENSSAUG00010013753              | ENSSLDG00000017035              | ENSSMAG00000015927              |
| <i>xrra1</i>   | ENSDLAG00005002022              | ENSLCAG00010006262              | ENSSAUG00010026544              | ENSSLDG00000020051 <sup>c</sup> | ENSSMAG00000013136              |

*defb*: beta-defensin; *atp1b2b*: ATPase Na<sup>+</sup>/K<sup>+</sup> transporting subunit beta 2b/ Sodium/ potassium-transporting ATPase subunit beta-2; *CAPN6*: Calpain 6; *chrdl2*: chordin 2; *cnksr2b*: Connector enhancer of kinase suppressor of Ras 2b; *il13ra2*: Interleukin 13 receptor, alpha 2; *KCNAB3*: Potassium voltage-gated channel subfamily A regulatory beta subunit 3; *lrch2*: Leucine-rich repeats and calponin homology (CH) domain containing 2; *mepce*: Methylphosphate capping enzyme/ 7SK snRNA methylphosphate capping enzyme; *mogat3b*: Monoacylglycerol O-acyltransferase 3b/ Diacylglycerol O-acyltransferase 2; *neu3.1*: Sialidase 3 (membrane sialidase), tandem duplicate 1/ Neuraminidase 3; *nyap1*: Neuronal Tyrosine Phosphorylated Phosphoinositide-3-Kinase Adaptor 1; *or121*: Odorant receptor, family E, subfamily 121, member 1; *PAK3*: p21 (RAC1) activated kinase 3/ Serine/threonine-protein kinase PAK 3; *rnf121*: Ring finger protein 121; *rnf167*: Ring finger protein 167/ E3 ubiquitin-protein ligase RNF167; *rrm1*: Ribonucleotide reductase M1 polypeptide/ Ribonucleoside-diphosphate reductase large subunit; *spag7*: Sperm associated antigen 7; *srvt*: Serrate RNA effector molecule homolog; *trpc2b*: Transient receptor potential cation channel subfamily C member 2b/ Short transient receptor potential channel 2-like; *xrra1*: X-ray radiation resistance associated 1. <sup>a</sup> Predicted gene; <sup>b</sup> Reverse strand; <sup>c</sup> Incomplete gene.
