# Supplementary material for: Antimicrobial Peptides: Identification of two Beta-Defensins in a Teleost Fish, the European Sea Bass (Dicentrarchus labrax)
Source: MDPI journal article supplement (doi:10.3390/ph14060566), 2021-06-14
Supplement: s1 [file s1]

**Table S2** Accession numbers of defensins used in the alignment and phylogenetic analysis.

| Species                        |                   | Gene                 | Accession number     |
|--------------------------------|-------------------|----------------------|----------------------|
| <i>Sparus aurata</i>           | Perciformes       | Beta-defensin        | FM158209             |
| <i>Sparus aurata</i>           | Perciformes       | Beta-defensin-like 2 | ENSSAUT00010069764.1 |
| <i>Epinephelus coioides</i>    | Perciformes       | Beta-defensin        | AET25528             |
| <i>Argyrosomus regius</i>      | Perciformes       | Beta-defensin        | ASW20415             |
| <i>Lates calcarifer</i>        | Perciformes       | Beta-defensin-like 1 | ENSLCAT00010056645.1 |
| <i>Lates calcarifer</i>        | Perciformes       | Beta-defensin-like 2 | ENSLCAT00010013452.1 |
| <i>Larimichthys crocea</i>     | Perciformes       | Beta-defensin-like 1 | ENSLCRT00005005151.1 |
| <i>Larimichthys crocea</i>     | Perciformes       | Beta-defensin-like 2 | ENSLCRT00005035395.1 |
| <i>Oreochromis niloticus</i>   | Cichliformes      | Beta-defensin 1      | AGW83444             |
| <i>Paramisgurnus dabryanus</i> | Cypriniformes     | Beta-defensin 1      | AGK65596             |
| <i>Paramisgurnus dabryanus</i> | Cypriniformes     | Beta-defensin 2      | AGH10110             |
| <i>Cyprinus carpio</i> L.      | Cypriniformes     | Beta-defensin 3      | AGZ03658             |
| <i>Danio rerio</i>             | Cypriniformes     | Beta-defensin-like 1 | NP_001075022         |
| <i>Danio rerio</i>             | Cypriniformes     | Beta-defensin-like 2 | NP_001075023         |
| <i>Danio rerio</i>             | Cypriniformes     | Beta-defensin-like 3 | NP_001075024         |
| <i>Ctenopharyngodon idella</i> | Cypriniformes     | Beta-defensin 3      | AQY18997             |
| <i>Carassius auratus</i>       | Cypriniformes     | Beta-defensin-like 3 | ENSCART00000074063.1 |
| <i>Gadus morhua</i>            | Gadiformes        | Beta-defensin        | AEB69787             |
| <i>Salmo salar</i>             | Salmoniformes     | Beta-defensin 1a     | QIX04703             |
| <i>Salmo salar</i>             | Salmoniformes     | Beta-defensin 2      | QIX04705             |
| <i>Salmo salar</i>             | Salmoniformes     | Beta-defensin 3      | QIX04706             |
| <i>Salmo salar</i>             | Salmoniformes     | Beta-defensin 4      | QIX04707             |
| <i>Salmo salar</i>             | Salmoniformes     | Beta-defensin 5a     | QIX04708             |
| <i>Oncorhynchus mykiss</i>     | Salmoniformes     | Beta-defensin 1      | CAK54950             |
| <i>Oncorhynchus mykiss</i>     | Salmoniformes     | Beta-defensin 2      | CAR82090             |
| <i>Oncorhynchus mykiss</i>     | Salmoniformes     | Beta-defensin 3      | CAR82091             |
| <i>Oncorhynchus mykiss</i>     | Salmoniformes     | Beta-defensin 4      | CAR82092             |
| <i>Takifugu rubripes</i>       | Tetraodontiformes | Beta-defensin-like 1 | CAJ57646             |
| <i>Tetraodon nigroviridis</i>  | Tetraodontiformes | Beta-defensin-like 1 | CAJ57644             |
| <i>Tetraodon nigroviridis</i>  | Tetraodontiformes | Beta-defensin-like 2 | CAJ57645             |
| <i>Paralichthys olivaceus</i>  | Pleuronectiformes | Beta-defensin 1      | ADA84138             |
| <i>Paralichthys olivaceus</i>  | Pleuronectiformes | Beta-defensin 3      | ADA84140             |
| <i>Paralichthys olivaceus</i>  | Pleuronectiformes | Beta-defensin 4      | ADA84141             |
| <i>Scophthalmus maximus</i>    | Pleuronectiformes | Beta-defensin-like 1 | ENSSMAT00000025713.1 |
| <i>Scophthalmus maximus</i>    | Pleuronectiformes | Beta-defensin 2      | MW648585             |
| <i>Ictalurus punctatus</i>     | Siluriformes      | Beta-defensin        | APU66342             |
| <i>Oplegnathus fasciatus</i>   | Centrarchiformes  | Beta-defensin        | AJA33388             |
| <i>Siniperca chuatsi</i>       | Centrarchiformes  | Beta-defensin        | ACO88907             |
| <i>Oryzias latipes</i>         | Beloniformes      | Beta-defensin        | ACG55699             |
| <i>Liza haematocheila</i>      | Mugiliformes      | Beta-defensin        | AIK66783             |
| <i>Acipenser dabryanus</i>     | Acipenseriformes  | Beta-defensin        | QBJ27760             |
| <i>Seriola lalandi</i>         | Carangiformes     | Beta-defensin-like 1 | ENSSLDT00000023067.1 |
| <i>Seriola lalandi</i>         | Carangiformes     | Beta-defensin-like 2 | ENSSLDT00000026660.1 |
| <i>Mus musculus</i>            | Rodentia          | Beta-defensin 1      | AAB72003             |
| <i>Mus musculus</i>            | Rodentia          | Beta-defensin 4      | NP_062702            |
| <i>Homo sapiens</i>            | Primates          | Beta-defensin 1      | AAB49758             |
| <i>Homo sapiens</i>            | Primates          | Beta-defensin 2      | AAC33549             |
| <i>Ovis aries</i>              | Artiodactyla      | Beta-defensin 1      | DAB41723             |

|                          |             |                  |           |
|--------------------------|-------------|------------------|-----------|
| <i>Gallus gallus</i>     | Galliformes | Beta-defensin 1  | AAT48925  |
| <i>Bothrops jararaca</i> | Squamata    | Beta-defensin 2  | AGF25387  |
| <i>Crassostrea gigas</i> | Ostreida    | Beta-defensin 1  | AEE92768  |
| <i>Homo sapiens</i>      | Primates    | Alpha-defensin 1 | NP_004075 |
| <i>Mus musculus</i>      | Rodentia    | Alpha-defensin 1 | NP_034161 |
| <i>Papio anubis</i>      | Primates    | Theta-defensin a | ACJ12913  |
