# Supplementary material for: Antimicrobial Peptides: Identification of two Beta-Defensins in a Teleost Fish, the European Sea Bass (Dicentrarchus labrax)
Source: MDPI journal article supplement (doi:10.3390/ph14060566), 2021-06-14
Supplement: s1 [file s1]

**Supplementary Figure 1.** Identity scores between vertebrate beta-defensins. Percentages were determined using the SIAS (Sequence Identity And Similarity) server (<http://imed.med.ucm.es/Tools/sias.html>), with BLOSUM62 scoring matrix and considering the length of multiple sequence alignment.
