# Supplementary material for: Antimicrobial Peptides: Identification of two Beta-Defensins in a Teleost Fish, the European Sea Bass (Dicentrarchus labrax)
Source: MDPI journal article supplement (doi:10.3390/ph14060566), 2021-06-14
Supplement: s1 [file s1]

**Table S1** Accession numbers of vertebrate beta-defensin genes.

| Species                        | Order             | Gene                 | Accession number   |
|--------------------------------|-------------------|----------------------|--------------------|
| <i>Dicentrarchus labrax</i>    | Perciformes       | Beta-defensin 1      | CBXY010003646      |
| <i>Dicentrarchus labrax</i>    | Perciformes       | Beta-defensin 2      | CBXY010003659      |
| <i>Sparus aurata</i>           | Perciformes       | Beta-defensin-like 2 | ENSSAUG00010026539 |
| <i>Epinephelus coioides</i>    | Perciformes       | Beta-defensin        | JN698964           |
| <i>Oreochromis niloticus</i>   | Cichliformes      | Beta-defensin 1      | KJ577575           |
| <i>Paramisgurnus dabryanus</i> | Cypriniformes     | Beta-defensin 1      | KC494302           |
| <i>Paramisgurnus dabryanus</i> | Cypriniformes     | Beta-defensin 2      | KC261302           |
| <i>Tetraodon nigroviridis</i>  | Tetraodontiformes | Beta-defensin-like 1 | BN000873           |
| <i>Tetraodon nigroviridis</i>  | Tetraodontiformes | Beta-defensin-like 2 | BN000874           |
| <i>Onchorhynchus mykiss</i>    | Salmoniformes     | Beta-defensin 1      | FN545575           |
| <i>Onchorhynchus mykiss</i>    | Salmoniformes     | Beta-defensin 2      | FN545576           |
| <i>Onchorhynchus mykiss</i>    | Salmoniformes     | Beta-defensin 3      | FN545577           |
| <i>Homo sapiens</i>            | Primates          | Beta-defensin 2      | AF040153           |
| <i>Mus musculus</i>            | Rodentia          | Beta-defensin 4      | AF288371           |
| <i>Ovis aries</i>              | Artiodactyla      | Beta-defensin 1      | BK010312           |
| <i>Gallus gallus</i>           | Galliformes       | Beta-defensin 1      | AY621316           |
| <i>Bothrops jararaca</i>       | Squamata          | Beta-defensin        | KC117163           |
